# Supplementary material for: Uncertainty-inspired open set learning for retinal anomaly identification
Source: PubMed Central journal article supplement (PMC10598011; doi:10.1038/s41467-023-42444-7), 2023-10-24
Supplement: 41467_2023_42444_MOESM1_ESM.pdf [file 41467_2023_42444_MOESM1_ESM.pdf]

# Supplementary Information

Supplementary Table 1: Precision of different models on different testing sets (%)

| Category | Internal testing set |       |                     | TC-JSIEC          |        |                     | TC-unseen         |       |                     |
|----------|----------------------|-------|---------------------|-------------------|--------|---------------------|-------------------|-------|---------------------|
|          | Standard AI model    | UIOS  | UIOS + Thresholding | Standard AI model | UIOS   | UIOS + Thresholding | Standard AI model | UIOS  | UIOS + Thresholding |
| Normal   | 95.08                | 98.38 | 99.76               | 69.05             | 77.78  | 81.82               | 62.49             | 76.77 | 87.10               |
| TF       | 95.60                | 94.62 | 98.68               | 68.75             | 65.00  | 90.00               | 74.33             | 81.72 | 95.90               |
| PM       | 95.43                | 99.42 | 100.00              | 98.18             | 100.00 | 100.00              | 82.50             | 81.16 | 98.31               |
| GL       | 100.00               | 99.50 | 100.00              | 70.00             | 88.89  | 100.00              | 76.49             | 75.05 | 92.96               |
| RVO      | 96.85                | 95.56 | 99.21               | 100.00            | 100.00 | 100.00              | 92.46             | 90.37 | 99.49               |
| RD       | 88.24                | 98.91 | 100.00              | 98.21             | 100.00 | 100.00              | 35.89             | 69.32 | 91.74               |
| AMD      | 96.30                | 96.91 | 99.21               | 73.96             | 88.10  | 98.63               | 53.67             | 57.71 | 74.07               |
| DR       | 95.30                | 98.48 | 99.62               | 93.98             | 95.56  | 100.00              | 65.06             | 85.21 | 96.89               |
| CSCR     | 68.22                | 96.34 | 100.00              | 51.85             | 63.64  | 100.00              | 76.05             | 82.08 | 95.56               |
| Average  | 92.34                | 97.57 | 99.61               | 80.44             | 86.55  | 96.72               | 68.77             | 77.71 | 92.45               |

Supplementary Table 2: Sensitivity of different models on different testing sets (%)

| Category | Internal testing set |        |                     | TC-JSIEC          |        |                     | TC-unseen         |       |                     |
|----------|----------------------|--------|---------------------|-------------------|--------|---------------------|-------------------|-------|---------------------|
|          | Standard AI model    | UIOS   | UIOS + Thresholding | Standard AI model | UIOS   | UIOS + Thresholding | Standard AI model | UIOS  | UIOS + Thresholding |
| Normal   | 100.00               | 100.00 | 100.00              | 76.32             | 92.11  | 100.00              | 95.01             | 90.73 | 99.43               |
| TF       | 90.63                | 91.67  | 98.68               | 84.62             | 100.00 | 100.00              | 49.40             | 75.40 | 83.27               |
| PM       | 96.53                | 98.27  | 98.80               | 100.00            | 100.00 | 100.00              | 77.46             | 78.87 | 91.34               |
| GL       | 94.66                | 97.57  | 100.00              | 53.85             | 61.54  | 87.50               | 78.93             | 81.91 | 97.29               |
| RVO      | 94.62                | 99.23  | 100.00              | 75.76             | 90.91  | 100.00              | 50.69             | 80.17 | 94.69               |
| RD       | 99.26                | 99.63  | 100.00              | 96.49             | 89.47  | 97.73               | 76.95             | 75.31 | 93.46               |
| AMD      | 80.97                | 97.58  | 99.60               | 95.95             | 100.00 | 100.00              | 35.56             | 44.38 | 79.37               |
| DR       | 91.29                | 97.60  | 99.62               | 73.58             | 81.13  | 93.85               | 45.33             | 81.31 | 95.20               |
| CSCR     | 84.88                | 91.86  | 98.67               | 100.00            | 100.00 | 100.00              | 83.60             | 85.68 | 90.80               |
| Average  | 92.54                | 97.04  | 99.49               | 84.06             | 90.57  | 97.67               | 65.88             | 77.08 | 91.65               |

Supplementary Table 3: Specificity of different models on different testing sets (%)

| Category | Internal testing set |       |                     | TC-JSIEC          |        |                     | TC-unseen         |       |                     |
|----------|----------------------|-------|---------------------|-------------------|--------|---------------------|-------------------|-------|---------------------|
|          | Standard AI model    | UIOS  | UIOS + Thresholding | Standard AI model | UIOS   | UIOS + Thresholding | Standard AI model | UIOS  | UIOS + Thresholding |
| Normal   | 98.61                | 99.56 | 99.93               | 96.73             | 97.48  | 98.73               | 89.86             | 95.12 | 96.74               |
| TF       | 99.79                | 99.74 | 99.94               | 98.82             | 98.34  | 99.69               | 97.32             | 97.35 | 99.40               |
| PM       | 99.56                | 99.95 | 100.00              | 99.74             | 100.00 | 100.00              | 99.00             | 98.89 | 99.89               |
| GL       | 100.00               | 99.94 | 100.00              | 99.29             | 99.76  | 100.00              | 96.20             | 95.74 | 98.88               |
| RVO      | 99.79                | 99.68 | 99.94               | 100.00            | 100.00 | 100.00              | 99.55             | 99.08 | 99.94               |
| RD       | 97.93                | 99.83 | 100.00              | 99.74             | 100.00 | 100.00              | 90.38             | 97.67 | 99.51               |
| AMD      | 99.48                | 99.48 | 99.87               | 93.07             | 97.23  | 99.62               | 97.02             | 96.84 | 98.08               |
| DR       | 99.11                | 99.70 | 99.94               | 98.48             | 98.78  | 100.00              | 95.62             | 97.46 | 99.59               |
| CSCR     | 98.23                | 99.84 | 100.00              | 96.91             | 98.10  | 100.00              | 96.53             | 97.53 | 99.35               |
| Average  | 99.17                | 99.75 | 99.96               | 98.09             | 98.86  | 99.78               | 95.72             | 97.30 | 99.04               |

Supplementary Table 4: Distribution of data after filtering out samples with uncertainty scores above the threshold value of  $\theta$ 

| Dataset | Internal testing set |                    | TC-JSIEC |                    | TC-unseen |                    |
|---------|----------------------|--------------------|----------|--------------------|-----------|--------------------|
|         | Original             | After thresholding | Original | After thresholding | Original  | After thresholding |
| Normal  | 425                  | 423                | 38       | 18                 | 561       | 353                |
| TF      | 96                   | 76                 | 13       | 9                  | 504       | 281                |
| PM      | 173                  | 166                | 54       | 53                 | 213       | 127                |
| GL      | 206                  | 183                | 13       | 8                  | 503       | 258                |
| RVO     | 130                  | 126                | 66       | 51                 | 363       | 207                |
| RD      | 272                  | 252                | 57       | 44                 | 243       | 107                |
| AMD     | 289                  | 252                | 74       | 72                 | 329       | 126                |
| DR      | 333                  | 261                | 106      | 65                 | 567       | 229                |
| CSCR    | 86                   | 75                 | 14       | 14                 | 433       | 261                |
| Total   | 2,010                | 1,814              | 435      | 334                | 3,716     | 1,949              |

Supplementary Table 4 shows the distribution of different testing sets after filtering out samples with uncertainty scores above the threshold value of  $\theta$ . As shown in Supplementary Table 4, most of the samples in the internal testing set, which have a similar feature distribution to the training data, obtained high-confidence prediction results. However, the two external test data sets, TC-JSIEC and TC-unseen, have a large difference in feature distribution from the training data. Consequently, more samples from these sets required double-checking by the ophthalmologist to avoid mis-/under-diagnosis may be caused by the samples with low confidence prediction results. These results are consistent with the observation in clinical practice that junior physicians can accurately identify fundus diseases with distinctive features with high confidence. However, data with ambiguous features are often judged with low confidence, and it is necessary to seek further confirmation from a senior ophthalmologist before a final diagnosis can be made.

Supplementary Table 5: F1 scores of different methods on internal testing set (%)

| Category | MC-Drop | Ensemble | TTA   | Entropy | UIOS  |
|----------|---------|----------|-------|---------|-------|
| Normal   | 99.05   | 97.69    | 97.79 | 97.67   | 99.18 |
| TF       | 95.43   | 94.18    | 90.00 | 91.30   | 93.12 |
| PM       | 91.54   | 97.66    | 95.51 | 95.18   | 98.84 |
| GL       | 91.31   | 93.58    | 92.52 | 93.09   | 98.53 |
| RVO      | 93.63   | 96.44    | 96.53 | 96.12   | 97.36 |
| RD       | 95.64   | 96.38    | 92.51 | 92.13   | 99.27 |
| AMD      | 90.65   | 90.98    | 85.77 | 85.60   | 97.24 |
| DR       | 95.20   | 95.41    | 91.56 | 91.04   | 98.04 |
| CSCR     | 87.06   | 89.02    | 82.29 | 81.03   | 94.05 |
| Average  | 93.28   | 94.59    | 91.61 | 91.46   | 97.29 |

Supplementary Table 6: F1 scores of different methods on internal testing set after thresholding (%)

| Category | MC-Drop | Ensemble | TTA   | Entropy | UIOS   |
|----------|---------|----------|-------|---------|--------|
| Normal   | 99.87   | 99.37    | 99.60 | 99.88   | 99.88  |
| TF       | 97.56   | 98.59    | 96.92 | 98.99   | 98.68  |
| PM       | 97.44   | 99.66    | 97.58 | 100.00  | 99.39  |
| GL       | 97.71   | 99.49    | 97.17 | 99.73   | 100.00 |
| RVO      | 99.07   | 98.36    | 98.06 | 99.53   | 99.60  |
| RD       | 99.40   | 99.18    | 97.05 | 99.38   | 100.00 |
| AMD      | 97.23   | 98.98    | 92.45 | 98.54   | 99.41  |
| DR       | 98.84   | 98.87    | 96.72 | 99.44   | 99.62  |
| CSCR     | 98.97   | 95.45    | 90.43 | 96.00   | 99.33  |
| Average  | 98.45   | 98.66    | 96.22 | 99.05   | 99.55  |

Supplementary Table 7: P-values of F1 scores for UIOS model compared to other methods on different datasets

| Methods        | Internal testing set | TC-JSIEC     | TC-unseen    | Internal testing set+thresholding | TC-JSIEC+thresholding | TC-unseen dataset+thresholding |
|----------------|----------------------|--------------|--------------|-----------------------------------|-----------------------|--------------------------------|
| UIOS->Baseline | <b>0.029</b>         | <b>0.006</b> | <b>0.008</b> | /                                 | /                     | /                              |
| UIOS->MC-Drop  | <b>0.008</b>         | <b>0.026</b> | <b>0.001</b> | <b>0.005</b>                      | 0.091                 | <b>0.004</b>                   |
| UIOS->Ensemble | <b>0.009</b>         | 0.376        | <b>0.001</b> | 0.058                             | 0.286                 | <b>0.009</b>                   |
| UIOS->Entropy  | <b>0.004</b>         | <b>0.045</b> | <b>0.001</b> | 0.235                             | <b>0.046</b>          | <b>0.027</b>                   |
| UIOS->TTA      | <b>0.003</b>         | <b>0.030</b> | <b>0.001</b> | <b>0.007</b>                      | <b>0.042</b>          | <b>0.0002</b>                  |

P-Value was calculated by two-sided T-Test, and no adjustments were made for multiple comparisons.

Supplementary Table 8: P-values of AUC for UIOS model compared to other methods on different datasets

| Methods        | Internal testing set | TC-JSIEC     | TC-unseen    | Internal testing set+thresholding | TC-JSIEC+thresholding | TC-unseen dataset+thresholding |
|----------------|----------------------|--------------|--------------|-----------------------------------|-----------------------|--------------------------------|
| UIOS->Baseline | 0.371                | <b>0.002</b> | 0.196        | /                                 | /                     | /                              |
| UIOS->MC-Drop  | <b>0.036</b>         | 0.055        | <b>0.003</b> | 0.058                             | 0.115                 | <b>0.006</b>                   |
| UIOS->Ensemble | <b>0.036</b>         | 0.219        | <b>0.036</b> | 0.071                             | 0.276                 | <b>0.033</b>                   |
| UIOS->Entropy  | 0.565                | <b>0.020</b> | 0.610        | 0.263                             | <b>0.029</b>          | 0.259                          |
| UIOS->TTA      | <b>0.032</b>         | <b>0.023</b> | <b>0.010</b> | <b>0.017</b>                      | <b>0.015</b>          | <b>0.005</b>                   |

P-Value was calculated by two-sided T-Test, and no adjustments were made for multiple comparisons.



Supplementary Table 9: Rates for prompting a human grading and correct disease prediction with high uncertainty above threshold

| Category                                                                 | Internal testing set (%) | TC-JSIEC(%) | TC-unseen dataset (%) |
|--------------------------------------------------------------------------|--------------------------|-------------|-----------------------|
| Rate for prompting a human grading                                       | 9.75                     | 23.22       | 47.55                 |
| Rate of correct disease prediction with high uncertainty above threshold | 8.06                     | 15.40       | 30.09                 |

Supplementary Table 10: F1 scores of different methods on TC-JSIEC set (%)

| Category | MC-Drop | Ensemble | TTA   | Entropy | UIOS   |
|----------|---------|----------|-------|---------|--------|
| Normal   | 34.78   | 67.53    | 57.14 | 58.06   | 84.34  |
| TF       | 72.73   | 81.25    | 81.48 | 85.71   | 78.79  |
| PM       | 97.20   | 99.08    | 94.64 | 94.64   | 100.00 |
| GL       | 60.87   | 80.00    | 56.00 | 56.00   | 72.73  |
| RVO      | 84.75   | 89.08    | 90.32 | 90.32   | 95.24  |
| RD       | 92.45   | 96.36    | 91.43 | 91.43   | 94.44  |
| AMD      | 74.00   | 93.08    | 87.50 | 87.50   | 93.67  |
| DR       | 86.01   | 88.44    | 86.73 | 86.73   | 87.76  |
| CSCR     | 59.09   | 70.00    | 48.28 | 48.28   | 77.78  |
| Average  | 73.54   | 84.98    | 77.06 | 77.63   | 87.19  |

Supplementary Table 11: F1 scores of different methods on TC-unseen dataset (%)

| Category | MC-Drop | Ensemble | TTA   | Entropy | UIOS  |
|----------|---------|----------|-------|---------|-------|
| Normal   | 65.97   | 72.54    | 74.91 | 74.21   | 83.17 |
| TF       | 55.43   | 49.94    | 55.67 | 54.17   | 78.43 |
| PM       | 45.36   | 72.22    | 66.24 | 65.38   | 80.00 |
| GL       | 69.00   | 73.00    | 74.20 | 74.37   | 78.33 |
| RVO      | 67.01   | 60.23    | 65.34 | 65.21   | 84.96 |
| RD       | 61.28   | 60.68    | 60.64 | 61.84   | 72.19 |
| AMD      | 47.72   | 44.05    | 39.06 | 39.14   | 50.17 |
| DR       | 72.00   | 69.68    | 79.28 | 79.47   | 83.21 |
| CSCR     | 73.99   | 74.53    | 75.35 | 74.84   | 83.84 |
| Average  | 61.97   | 64.10    | 65.63 | 65.40   | 77.15 |

Supplementary Table 12: F1 scores of different methods on TC-JSIEC set after thresholding (%)

| Category | MC-Drop | Ensemble | TTA    | Entropy | UIOS   |
|----------|---------|----------|--------|---------|--------|
| Normal   | 22.22   | 66.67    | 63.64  | 40.00   | 90.00  |
| TF       | 92.31   | 100.00   | 100.00 | 50.00   | 94.74  |
| PM       | 100.00  | 100.00   | 96.91  | 99.05   | 100.00 |
| GL       | 90.91   | 100.00   | 76.92  | 66.67   | 93.33  |
| RVO      | 91.30   | 91.18    | 95.15  | 95.83   | 100.00 |
| RD       | 100.00  | 100.00   | 93.33  | 98.36   | 98.85  |
| AMD      | 85.31   | 96.97    | 95.33  | 95.74   | 99.31  |
| DR       | 89.71   | 98.63    | 91.34  | 98.46   | 96.83  |
| CSCR     | 76.19   | 85.71    | 61.54  | 88.00   | 100.00 |
| Average  | 83.11   | 93.24    | 86.02  | 81.35   | 97.01  |

Supplementary Table 13: F1 scores of different methods on TC-unseen dataset after thresholding (%)

| Category | MC-Drop | Ensemble | TTA   | Entropy | UIOS  |
|----------|---------|----------|-------|---------|-------|
| Normal   | 82.89   | 78.15    | 84.64 | 87.68   | 92.86 |
| TF       | 72.89   | 55.59    | 58.48 | 55.46   | 89.14 |
| PM       | 45.28   | 84.54    | 77.08 | 88.24   | 94.69 |
| GL       | 84.40   | 92.60    | 83.29 | 94.31   | 95.08 |
| RVO      | 74.56   | 63.89    | 68.92 | 80.19   | 97.03 |
| RD       | 81.40   | 84.48    | 65.95 | 85.11   | 92.59 |
| AMD      | 58.71   | 73.91    | 48.00 | 70.00   | 76.63 |
| DR       | 81.91   | 80.31    | 84.33 | 93.46   | 96.04 |
| CSCR     | 87.92   | 89.81    | 80.88 | 89.49   | 93.12 |
| Average  | 74.44   | 78.14    | 72.40 | 82.66   | 91.91 |

Supplementary Table 14: The abnormal detection rates of different methods on different datasets (%)

| Methods  | NTC          | NTC-<br>JSIEC | Low-quality  | RETOUCH      | OCTA          | VOC 2012     | Time<br>(ms/per<br>image) |
|----------|--------------|---------------|--------------|--------------|---------------|--------------|---------------------------|
| MC-Drop  | 71.96        | 69.92         | 54.32        | 1.40         | 59.21         | 73.56        | 18.11                     |
| Ensemble | 79.20        | 81.08         | 71.11        | 5.49         | <b>100.00</b> | 83.85        | 1.01                      |
| Entropy  | 82.61        | <b>83.27</b>  | 84.62        | 2.72         | 0.00          | 44.85        | <b>0.34</b>               |
| TTA      | 56.30        | 58.37         | 55.63        | 26.10        | 2.96          | 48.90        | 4.87                      |
| UIOS     | <b>86.67</b> | 82.27         | <b>89.40</b> | <b>99.81</b> | 99.01         | <b>96.18</b> | <b>0.34</b>               |

Supplementary Table 15: Sample size of the target categories datasets (%)

| Dataset | Primary TC dataset |              |                |             | TC-unseen | TC-JSIEC |
|---------|--------------------|--------------|----------------|-------------|-----------|----------|
|         | Total              | Training set | Validation set | Testing set |           |          |
| Normal  | 2,125              | 1,275        | 425            | 425         | 561       | 38       |
| TF      | 478                | 286          | 96             | 96          | 504       | 13       |
| PM      | 863                | 517          | 173            | 173         | 213       | 54       |
| GL      | 1,026              | 615          | 205            | 206         | 503       | 13       |
| RVO     | 650                | 390          | 130            | 130         | 363       | 66       |
| RD      | 1,359              | 815          | 272            | 272         | 243       | 57       |
| AMD     | 1,443              | 865          | 289            | 289         | 329       | 74       |
| DR      | 1,661              | 996          | 332            | 333         | 567       | 106      |
| CSCR    | 429                | 257          | 86             | 86          | 433       | 14       |
| Total   | 10,034             | 6,016        | 2,008          | 2,010       | 3,716     | 435      |

Supplementary Table 16. Inclusion criteria for Target Categories (TC) retinal diseases

| Categories                              | Primary TC dataset                                                                                                                                                                                                                                    | TC-unseen dataset                                                                                                                                                                                                                                                                                                                                                   |
|-----------------------------------------|-------------------------------------------------------------------------------------------------------------------------------------------------------------------------------------------------------------------------------------------------------|---------------------------------------------------------------------------------------------------------------------------------------------------------------------------------------------------------------------------------------------------------------------------------------------------------------------------------------------------------------------|
| Normal                                  | Orange-red fundus without any pathological changes.                                                                                                                                                                                                   | Orange-red fundus without pathological changes, but maybe with indistinct C/D ratio, blurring boundary of optic disc, few exposed choroidal large vessels, overexposure or underexposure, suspicious lens stains, or generally slightly blur due to medium opacity or defocus.                                                                                      |
| Tigroid Fundus (TF)                     | Extensive/diffuse attenuation of RPE exposed the underlying large choroidal vessels, with an area larger than half field.                                                                                                                             | Local attenuation of the RPE with visibility of underlying regional choroidal vessels with an area less than half field.                                                                                                                                                                                                                                            |
| Pathological Myopia (PM)                | Extensive tigroid fundus with massive chorioretinal atrophy, Fuchs spot, lacquer cracks, CNV, subretinal hemorrhage.                                                                                                                                  | Obvious tigroid fundus with tilted optic disc, optic disc arc atrophy, choroid thinning, but without massive focal chorioretinal atrophy or macular lesions. Or combined with epiretinal membrane and retinal holes leading to retinal detachment,                                                                                                                  |
| Glaucoma (GL)                           | Vertical C/D ratio $\geq 0.6$ , cup excavation and pale, thinning of neuroretinal rim, notching and bayoneting of vessels, baring of circumlinear blood vessels, laminar dot sign, disc hemorrhages, RNFL defects, peripapillary atrophy.             | Enlarged C/D ratio without other classic glaucomatous damages of optic head, may with tilt, neovascularization or overexposure of optic disc. May combined with other lesions like tigroid fundus, drusen, hemorrhage, etc.                                                                                                                                         |
| Retinal Vein Occlusion (RVO)            | Tortuosity and dilatation of affected branches of veins, with variable degrees of intraretinal hemorrhage (dot-, blot- or flame-like), cotton wool spots, hard exudates, macular edema or subretinal fluid in the distribution of affected veins.     | Sheathing, sclerosis or slightly dilation of affected veins, diffused/local distribution of variable hemorrhage but not strictly accompanying veins, maybe with chronic macular oedema, collateral vessels, glaucomatous optic nerve changes, retinal neovascularization, vitreous/preretinal hemorrhage or tractional retinal detachment. Laser spots may be seen. |
| Retinal Detachment (RD)                 | Detaching retina layer with a convex configuration and corrugated appearance, maybe with variable retinal breaks in view                                                                                                                              | Only small part of ambiguous detaching retina in view, or combined with other pathological lesions like massive vitreous hemorrhage, proliferative vitreoretinopathy or chorioretinal atrophy.                                                                                                                                                                      |
| Age-Related Macular Degeneration (AMD)  | Multiple dense or confluent drusen, focal hyper- and/or hypopigmentation of the RPE, thinning or geographic atrophy of RPE, choroidal neovascularization leading to fibrovascular/serous PED, sub-foveal atrophy or fibrosis secondary to an RPE tear | Only small or intermediate-sized drusen without other lesions, or orange-reddish bulb-like lesions associated with significant hemorrhagic and exudative detachments of retina and retinal pigment epithelium and hard exudates in polypoidal choroidal vasculopathy.                                                                                               |
| Diabetic Retinopathy (DR)               | Multiple microaneurysms, variable dot/blot-like hemorrhages, hard exudates, maybe with macular oedema, neovascularization, vitreous/preretinal hemorrhage or preretinal proliferative membrane.                                                       | Only microaneurysms (Mild NPDR), or severe proliferative membrane and vitreous hemorrhage covering the retinal characteristics. Any stages with laser spots.                                                                                                                                                                                                        |
| Central Serous Chorioretinopathy (CSCR) | Round or oval macular retinal elevation with distinct margins and turbid fluid underneath, small and yellow sub-retinal deposits. May with depigmented RPE foci or small patches of RPE atrophy or hyperplasia.                                       | Ambiguous retinal elevation with indistinct margins, or liquid partially absorbed leaving macular RPE mottling.                                                                                                                                                                                                                                                     |



Supplementary Table 17. Diagnosis and numbers of images in non-target categories (NTC) dataset and NTC-JSIEC dataset

| Datasets                                   | number |
|--------------------------------------------|--------|
| NTC dataset                                | 1380   |
| Retinal Artery Occlusion                   | 183    |
| Macular Hole                               | 265    |
| Epiretinal Membrane                        | 301    |
| Vogt-Koyanagi-Harada Disease               | 264    |
| Retinitis Pigmentosa                       | 308    |
| Asteroid Hyalosis                          | 59     |
| NTC-JSIEC dataset                          | 502    |
| Retinal Artery Occlusion                   | 16     |
| Macular Hole                               | 23     |
| Epiretinal membrane                        | 26     |
| Vogt-Koyanagi-Harada Disease               | 14     |
| Retinitis pigmentosa                       | 22     |
| Asteroid hyalosis                          | 14     |
| Optic atrophy                              | 12     |
| Hypertensive retinopathy                   | 15     |
| Large optic cup                            | 50     |
| Bietti crystalline dystrophy               | 8      |
| Disc swelling and elevation                | 13     |
| Dragged disc                               | 10     |
| Congenital disc abnormality                | 10     |
| Peripheral retinal degeneration and breaks | 14     |
| Myelinated nerve fiber                     | 11     |
| Fundus neoplasm                            | 8      |
| Yellow-white spots                         | 29     |
| Vessel tortuosity                          | 14     |
| Chorioretinal atrophy-coloboma             | 15     |
| Silicon oil in eye                         | 19     |
| Blur fundus                                | 159    |

Supplementary Table 18: F1 scores (%) of the ablation experiments

| Backbone | $L_{UN}$ | $L_{TUN}$ | Internal testing set | TC-JSIEC     | TC-unseen    | Average      |
|----------|----------|-----------|----------------------|--------------|--------------|--------------|
| √        | ×        | ×         | 92.20                | 80.69        | 64.74        | 79.21        |
| √        | √        | ×         | 94.02                | 76.05        | 64.72        | 78.27        |
| √        | ×        | √         | <b>97.29</b>         | <b>87.19</b> | <b>77.15</b> | <b>87.21</b> |

We conduct ablation experiments to demonstrate the effectiveness of the main components in our proposed UIOS. Supplementary Table 18 shows the ablation results. In our study, the pre-trained ResNet-50 is employed as our backbone for capturing the feature information in fundus images, Backbone+ $L_{UN}$  indicates the combination of ResNet-50 and subjective logical (SL) evidential uncertainty theory, while Backbone+ $L_{TUN}$  represent our proposed UIOS method. As shown in Supplementary Table 18, compared to the Backbone, Backbone+  $L_{UN}$  to enable the model to generate the prediction with uncertainty score based on the features that were parameterized by Dirichlet concentration. However, as shown in Supplementary Table 18, the F1 score of Backbone+ $L_{UN}$  on most testing sets is lower than that of Backbone, mainly because Dirichlet re-parameterization changes the original feature distribution, reducing the model's confidence in the class-related evidence, thus leading to lower performance. Focusing on this problem, we further improved the loss function by introducing a temperature cross-entropy loss function, which can enhance the model's confidence in the features that are re-parameterized by Dirichlet, thereby improving the performance in detecting retinal fundus diseases. Thus, it can be seen from Supplementary Table 18 that our proposed UIOS (Backbone+ $L_{TUN}$ ) achieves the highest performance compared to Backbone and Backbone+ $L_{UN}$  on the internal testing set, and two external test sets, the CJSIEC dataset and Non-typical CRD set, both of which have significantly different feature distributions from the training data. The F1 score of our UIOS on three testing set reaches 97.29%, 87.19%, and 77.15%, respectively. These experimental results further demonstrate the effectiveness of our proposed UIOS.

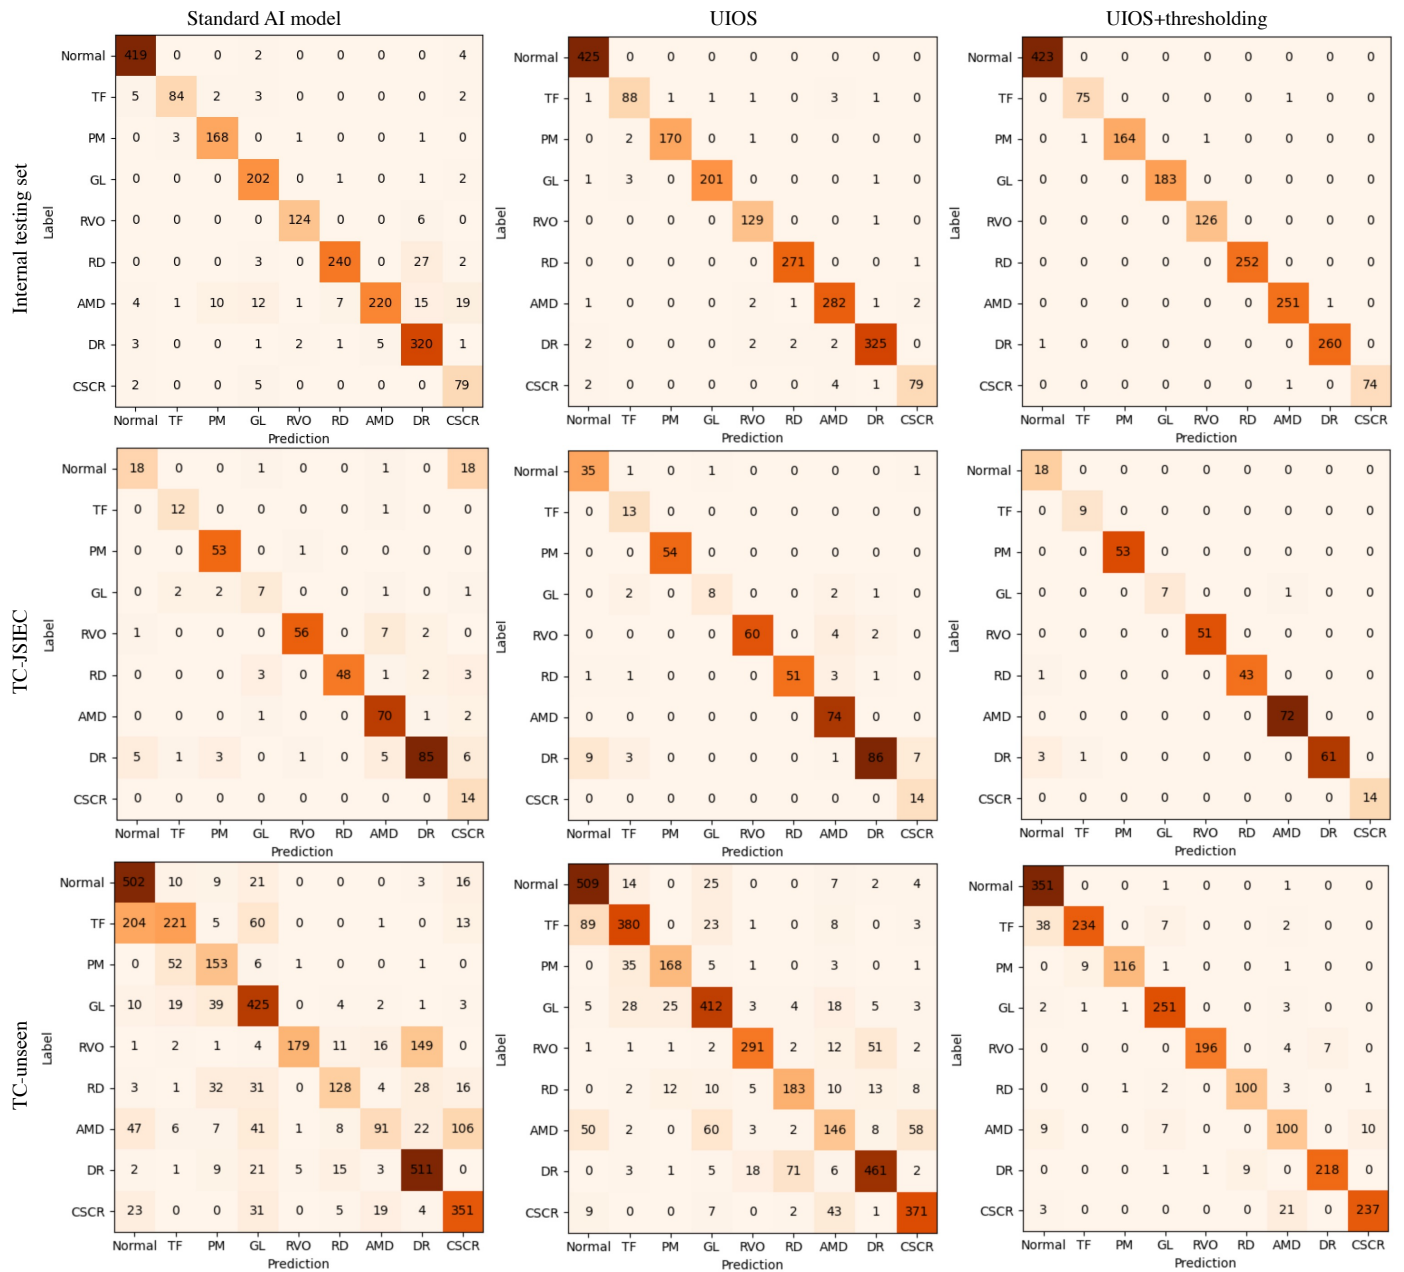

Supplementary Fig. 1. The confusion matrix of the standard AI model, our UIOS, and UIOS+Thresholding in internal and external testing datasets

As shown in Supplementary Fig. 1, our UIOS outperformed the standard AI model in terms of confusion matrix for all test sets. Furthermore, when applying our thresholding strategy (UIOS+thresholding) to suggest that samples with uncertainty scores above the threshold seek manual check by an ophthalmologist, we observed a further significant improvement in the confusion matrix and a significant reduction in misclassified samples.

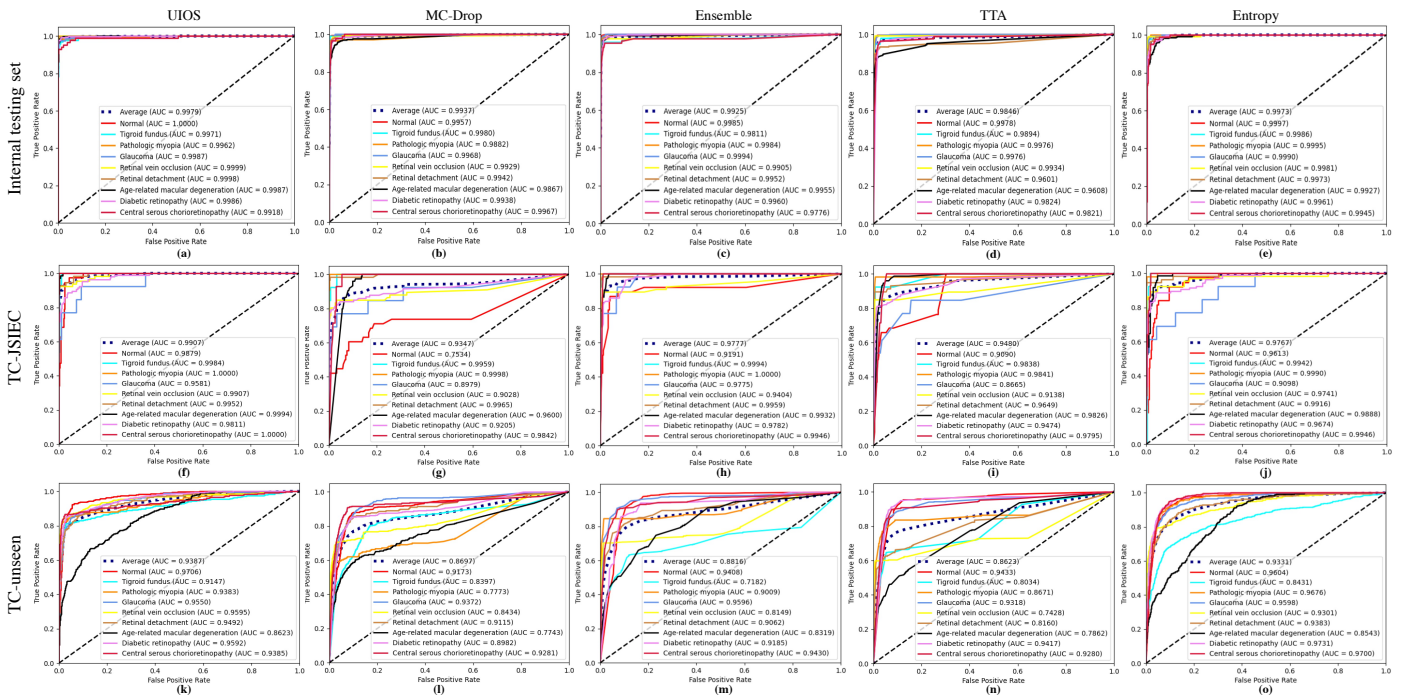

Supplementary Fig. 2. The receiver operating characteristic (ROC) curves of our UIOS model and other uncertainty-based methods in internal and two external testing datasets. Source data are provided as a Source Data file.

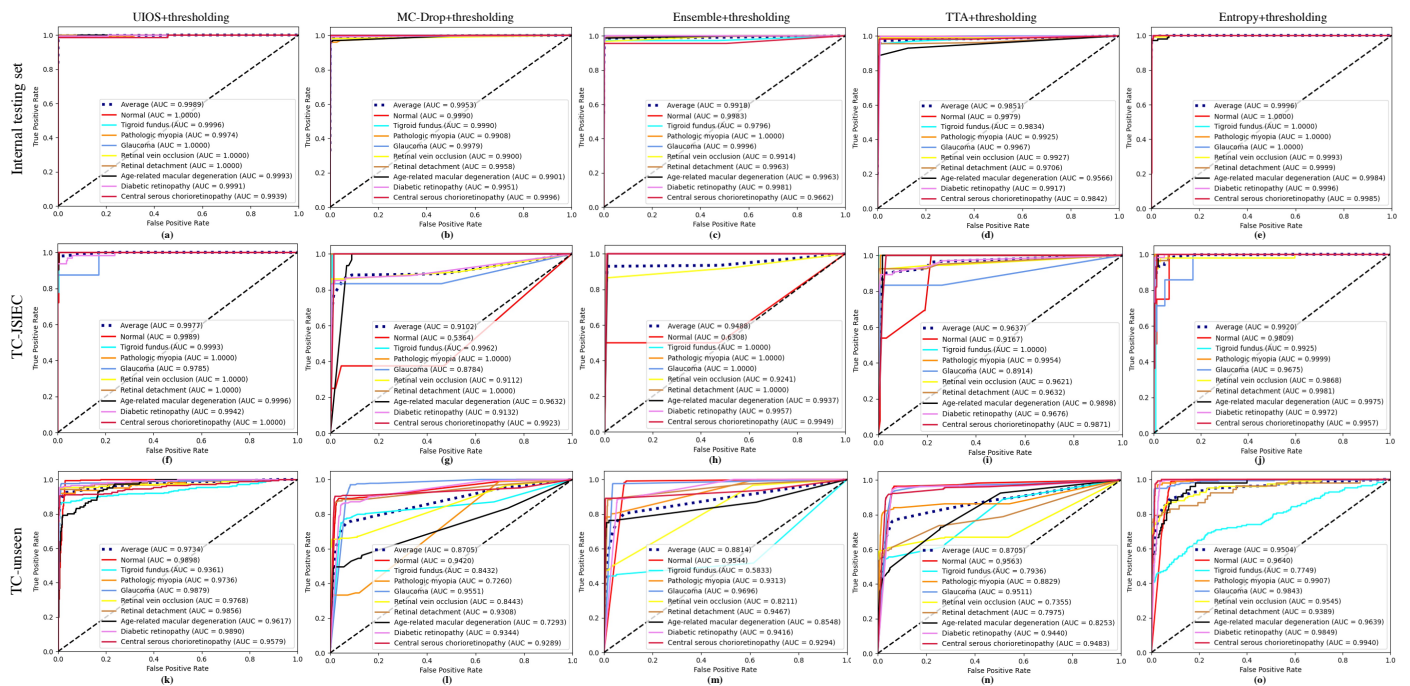

Supplementary Fig. 3. The receiver operating characteristic (ROC) curves of our UIOS+thresholding and other uncertainty-based methods+thresholding in internal and two external testing datasets. Source data are provided as a Source Data file.

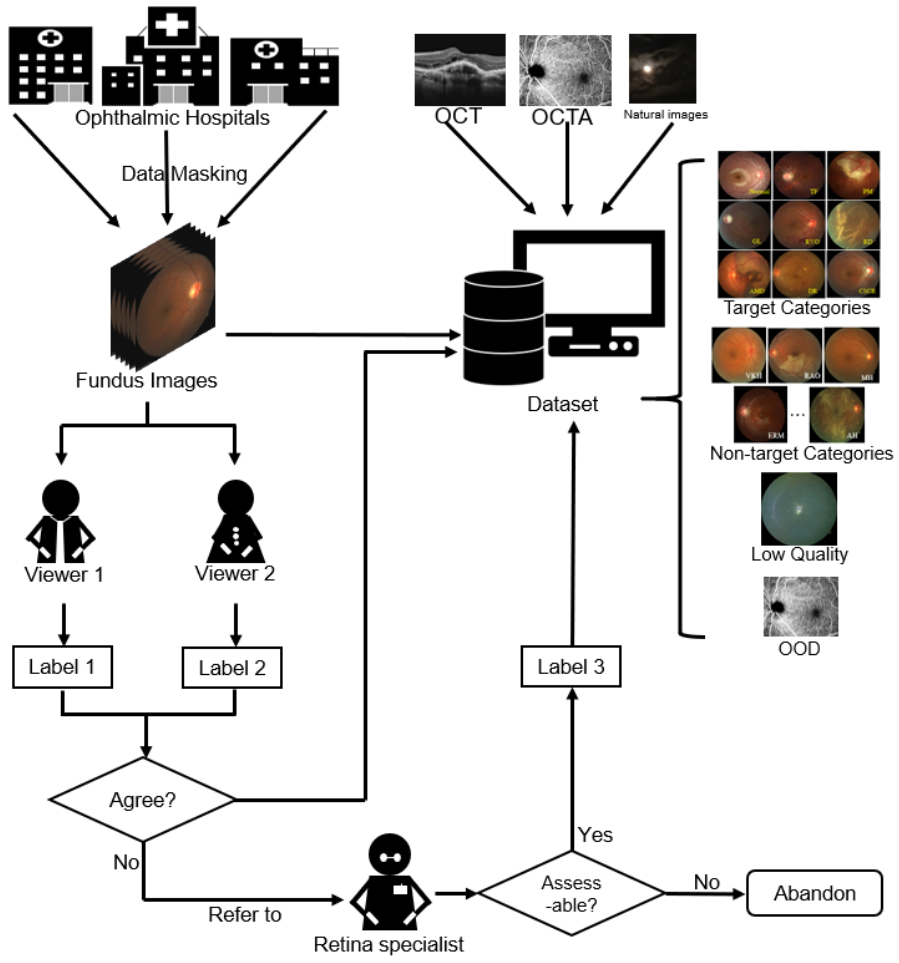

Supplementary Fig. 4. Flowchart of the data collection and annotation
